# Supplementary material
Source: Springer Nature journal article supplement (https://springermedizin.de/resource/supplementary/12891_2009_760_MOESM1_ESM.pdf/9506630)
Supplement: MOESM1 [file 9506630]

|                     | Item                                                                          | MTU (Experimental)                                | PT (Control)                  |
|---------------------|-------------------------------------------------------------------------------|---------------------------------------------------|-------------------------------|
| Diagnostic process  | Interview and clinical tests.                                                 | Yes                                               | Yes                           |
|                     | Test and measuring of total mobility                                          | Yes, only to evaluate the treatment               | Yes                           |
|                     | Testing muscle tension                                                        | No                                                | Yes                           |
|                     | Testing muscle strength                                                       | Only in case of expected neurological entrapments | Yes                           |
|                     | Testing coordination                                                          | No                                                | Yes                           |
|                     | Analysing individual preference of movement                                   | Yes                                               | No                            |
|                     | Analysing asymmetric posture and movements                                    | Yes                                               | No                            |
| Therapeutic process | Planning and intervention of the treatment                                    | Yes                                               | Yes                           |
|                     | Active exercise to increase total mobility                                    | Only to stimulate the function                    | Yes                           |
|                     | Active exercise to increase muscle tension in neck and shoulder muscle        | No                                                | Yes                           |
|                     | Active exercise to increase muscle strength                                   | No                                                | Yes                           |
|                     | Active exercise to optimize stability                                         | No                                                | Yes                           |
|                     | Active exercise to optimize coordination                                      | No                                                | Yes                           |
|                     | Massage therapy                                                               | No                                                | Yes                           |
|                     | passive angular arthrokinematic three dimensional mobilizations of the joints | Yes                                               | No, only global mobilizations |
|                     | Treatment of total body function                                              | Yes                                               | Is not common                 |
|                     | Informing and advising the patient                                            | Yes                                               | Yes                           |
|                     | Evaluation of the treatment                                                   | Yes                                               | Yes                           |
|                     | Ending treatment                                                              | Yes                                               | Yes                           |
